# Supplementary material
Source: PubMed Central journal article supplement (PMC556230)
Supplement: pnas_102_15_5588__1.pdf [file pnas_102_15_5588__1.pdf]

## Supporting Text

### 1. Derivation of the flux ratios ( $V_{cyc}/V_{TCA}$ ) based on steady-state labeling from [2- $^{13}\text{C}$ ]acetate

The metabolism of [2- $^{13}\text{C}$ ]acetate is depicted in Fig. 5. [2- $^{13}\text{C}$ ]Acetate is metabolized exclusively in glial cells to  $\text{AcCo}_a\text{C}_2$ , followed by its oxidation in the glial TCA cycle leading to  $^{13}\text{C}$  labeling of  $\alpha$ -ketoglutarate. The  $^{13}\text{C}$  label is transferred into cytosolic glutamate-C4 after exchange with mitochondrial  $\alpha$ -ketoglutarate-C4 and converted to glutamine-C4 by glutamine synthetase. Glutamine-C4 is released by astroglia and metabolized by neurons to glutamate-C4 (Fig. 5A). In GABAergic neurons, glutamate-C4 is decarboxylated to GABA-C2 (Fig. 5B). Glutamine-C2/C3 and glutamate-C2/C3 carbons are labeled during subsequent turns of the TCA cycle.

#### A. Derivation of $V_{cyc}(\text{Glu}/\text{Gln})/V_{TCA}(\text{Glu})$ for glutamatergic neurons

The dynamic  $^{13}\text{C}$  labeling of Gln and Glu in astroglia and glutamatergic neurons can be described by the following equations:

$$d[\text{Gln}_{\text{Glu4}}^*]/dt = V_{cyc}(\text{Gln}/\text{Glu}) \text{Gln}_{a4} - V_{cyc}(\text{Gln}/\text{Glu}) \text{Gln}_{\text{Glu4}} \quad [1]$$

$$d[\text{Glu}_{\text{Glu4}}^*]/dt = V_{cyc}(\text{Gln}/\text{Glu}) \text{Gln}_{\text{Glu4}} - (V_{cyc}(\text{Glu}/\text{Gln}) + V_{TCA}(\text{Glu})) \text{Glu}_{\text{Glu4}}, \quad [2]$$

where  $\text{Glx}_{i4}$  represents percent  $^{13}\text{C}$  enrichment of glutamate or glutamine at carbon 4 in glutamatergic neurons (Glu) or astroglia (a), and  $V_{cyc}(\text{Glu}/\text{Gln}) = V_{cyc}(\text{Gln}/\text{Glu})$ .

At isotopic steady state, Eq. 1 becomes

$$V_{cyc}(\text{Glu}/\text{Gln}) \text{Gln}_{a4} - V_{cyc}(\text{Gln}/\text{Glu}) \text{Gln}_{\text{Glu4}} = 0$$

$$\text{which leads to } \text{Gln}_{\text{Glu4}} = \text{Gln}_{a4}. \quad [3]$$

Similarly, at isotopic steady state, Eq. 2 becomes

$$V_{cyc}(\text{Gln}/\text{Glu}) \text{Gln}_{\text{Glu4}} - (V_{cyc}(\text{Glu}/\text{Gln}) + V_{TCA}(\text{Glu})) \text{Glu}_{\text{Glu4}} = 0.$$

For  $V_{cyc}(\text{Glu}/\text{Gln}) = V_{cyc}(\text{Gln}/\text{Glu})$ ,

it leads to

$$V_{cyc}(\text{Glu}/\text{Gln})/V_{TCA}(\text{Glu}) = \text{Glu}_{\text{Glu4}}/(\text{Gln}_{\text{Glu4}} - \text{Glu}_{\text{Glu4}}). \quad [4]$$

Substituting the value of  $\text{Gln}_{\text{Glu4}}$  from Eq. 3 gives

$$V_{cyc}(\text{Glu}/\text{Gln})/V_{TCA}(\text{Glu}) = \text{Glu}_{\text{Glu4}}/(\text{Gln}_{a4} - \text{Glu}_{\text{Glu4}}). \quad [5]$$

#### B. Derivation of $V_{cyc}(\text{GABA}/\text{Gln})/V_{TCA}(\text{GABA})$ for GABAergic neurons

The dynamic  $^{13}\text{C}$  labeling of Gln and Glu in GABAergic neurons can be described by the following equations:

$$d[\text{Glu}_{\text{Gaba4}}^*]/dt = V_{\text{cyc}(\text{Gln}/\text{Gaba})} \text{Gln}_{\text{a4}} - (V_{\text{TCA}(\text{Gaba})\text{Net}} + V_{\text{GAD}}) \text{Glu}_{\text{Gaba4}}, \quad [6]$$

where  $\text{Gln}_{\text{Gaba4}} = \text{Gln}_{\text{a4}}$  from Eq. 3 for glutamatergic neurons.

$$d[\text{GABA}_{\text{Gaba2}}^*]/dt = V_{\text{GAD}} \text{Glu}_{\text{Gaba4}} - (V_{\text{cyc}(\text{Gaba}/\text{Gln})} + V_{\text{shunt}}) \text{GABA}_{\text{Gaba2}}, \quad [7]$$

$$\text{where } V_{\text{TCA}(\text{Gaba})} = V_{\text{TCA}(\text{Gaba})\text{Net}} + V_{\text{shunt}} \quad [8]$$

$$\text{and } V_{\text{GAD}} = V_{\text{cyc}(\text{Gaba}/\text{Gln})} + V_{\text{shunt}}, \quad [9]$$

and where  $\text{Glu}_{\text{Gaba4}}$  and  $\text{GABA}_{\text{Gaba2}}$  represents the percent  $^{13}\text{C}$  enrichment of glutamate-C4 and GABA-C2 in GABAergic neurons, and  $V_{\text{cyc}(\text{Gaba}/\text{Gln})} = V_{\text{cyc}(\text{Gln}/\text{Gaba})}$ .

At isotopic steady state, Eq. 6 becomes:

$$V_{\text{cyc}(\text{Gln}/\text{Gaba})} \text{Gln}_{\text{a4}} - (V_{\text{TCA}(\text{Gaba})\text{Net}} + V_{\text{GAD}}) \text{Glu}_{\text{Gaba4}} = 0.$$

$$\text{Therefore, } \text{Glu}_{\text{Gaba4}} = V_{\text{cyc}(\text{Gln}/\text{Gaba})} \text{Gln}_{\text{a4}} / (V_{\text{TCA}(\text{Gaba})\text{Net}} + V_{\text{GAD}}). \quad [10]$$

Similarly, at isotopic steady state, Eq. 7 becomes:

$$V_{\text{GAD}} \text{Glu}_{\text{Gaba4}} - (V_{\text{cyc}(\text{Gaba}/\text{Gln})} + V_{\text{shunt}}) \text{GABA}_{\text{Gaba2}} = 0.$$

Substituting  $V_{\text{cyc}(\text{Gaba}/\text{Gln})} + V_{\text{shunt}}$  and  $\text{Glu}_{\text{Gaba4}}$  from Eqs. 8 and 9, respectively, gives:

$$V_{\text{GAD}} V_{\text{cyc}(\text{Gln}/\text{Gaba})} \text{Gln}_{\text{a4}} / (V_{\text{TCA}(\text{Gaba})\text{Net}} + V_{\text{GAD}}) - V_{\text{GAD}} \text{GABA}_{\text{Gaba2}} = 0,$$

which is equivalent to

$$V_{\text{cyc}(\text{Gln}/\text{Gaba})} \text{Gln}_{\text{a4}} = (V_{\text{TCA}(\text{Gaba})\text{Net}} + V_{\text{GAD}}) \text{GABA}_{\text{Gaba2}}.$$

Substituting  $V_{\text{TCA}(\text{Gaba})\text{Net}}$  and  $V_{\text{GAD}}$  from Eqs. 8 and 9, respectively,

$$V_{\text{cyc}(\text{Gaba}/\text{Gln})} \text{Gln}_{\text{a4}} = (V_{\text{TCA}(\text{Gaba})} - V_{\text{shunt}} + V_{\text{cyc}(\text{Gaba}/\text{Gln})} + V_{\text{shunt}}) \text{Gaba}_{\text{Gaba2}},$$

which after rearrangement gives

$$V_{\text{cyc}(\text{Gaba}/\text{Gln})} / V_{\text{TCA}(\text{Gaba})} = \text{Gaba}_{\text{Gaba2}} / (\text{Gln}_{\text{a4}} - \text{Gaba}_{\text{Gaba2}}). \quad [11]$$

## 2. Differential equations describing the three-compartment metabolic model (Fig. 1)

### Mass balance equations

$$d[\text{Glc}_{\text{brain}}]/dt = V_{\text{max}_{\text{in}}} \text{Glc}_{\text{blood}} / (\text{Km}_{\text{in}} + \text{Glc}_{\text{blood}}) - V_{\text{max}_{\text{out}}} \text{Glc}_{\text{brain}} / (\text{Km}_{\text{out}} + \text{Glc}_{\text{brain}}) - \text{CMR}_{\text{glc}} = 0$$

$$d[\text{L}]/dt = 2 \text{CMR}_{\text{glc}} + V_{\text{dilLac}(\text{influx})} - (V_{\text{PC}} + V_{\text{dilLac}(\text{efflux})} + V_{\text{pdh}(\text{a})} + V_{\text{pdh}(\text{Gaba})} + V_{\text{pdh}(\text{Glu})}) = 0$$

$$d[\text{Asp}_{\text{a}}]/dt = V_{\text{xa}(\text{OAA}/\text{Asp})} - V_{\text{xa}(\text{Asp}/\text{OAA})} = 0$$

$$d[\text{Glu}_{\text{a}}]/dt = V_{\text{cyc}(\text{Glu}/\text{Gln})} + V_{\text{xa}(\text{KG}/\text{Glu})} + V_{\text{cyc}(\text{Gaba}/\text{Gln})} - (V_{\text{Gln}} + V_{\text{xa}(\text{Glu}/\text{KG})}) = 0$$

$$d[\text{KG}_a]/dt = V_{\text{pdh}(a)} + V_{\text{xa}(\text{Glu/KG})} + V_{\text{dil}(a)} - (V_{\text{TCA}(a)\text{Net}} + V_{\text{xa}(\text{KG/Glu})} + V_{\text{cyc}(\text{Gaba/Gln})}) = 0$$

$$d[\text{OAA}_a]/dt = V_{\text{TCA}(a)\text{Net}} + V_{\text{xa}(\text{Asp/OAA})} + V_{\text{PC}} + V_{\text{cyc}(\text{Gaba/Gln})} - (V_{\text{xa}(\text{OAA/Asp})} + V_{\text{TCA}(a)}) = 0$$

$$d[\text{Gln}]/dt = V_{\text{Gln}} + V_{\text{dilGln}} - (V_{\text{Gln}(\text{efflux})} + V_{\text{cyc}(\text{Glu/Gln})} + V_{\text{cyc}(\text{Gaba/Gln})}) = 0$$

$$d[\text{Asp}_{\text{Gaba}}]/dt = V_{\text{xaGaba}(\text{OAA/Asp})} - V_{\text{xGaba}(\text{Asp/OAA})} = 0$$

$$d[\text{GABA}_{\text{Gaba}}]/dt = V_{\text{GAD}} - (V_{\text{shunt}} + V_{\text{cyc}(\text{Gln/Gaba})}) = 0$$

$$d[\text{Glu}_{\text{Gaba}}]/dt = V_{\text{cyc}(\text{Gln/Gaba})} + V_{\text{xGaba}(\text{KG/Glu})} - (V_{\text{GAD}} + V_{\text{xGaba}(\text{Glu/KG})}) = 0$$

$$d[\text{KG}_{\text{Gaba}}]/dt = V_{\text{pdh}(\text{Gaba})} + V_{\text{xGaba}(\text{Glu/KG})} + V_{\text{dil}(\text{Gaba})} - (V_{\text{TCA}(\text{Gaba})\text{Net}} + V_{\text{xGaba}(\text{KG/Glu})}) = 0$$

$$d[\text{OAA}_{\text{Gaba}}]/dt = V_{\text{TCA}(\text{Gaba})\text{Net}} + V_{\text{shunt}} + V_{\text{xGaba}(\text{Asp/OAA})} - (V_{\text{TCA}(\text{Gaba})} + V_{\text{xGaba}(\text{OAA/Asp})}) = 0$$

$$d[\text{Asp}_{\text{Glu}}]/dt = V_{\text{xGlu}(\text{OAA/Asp})} - V_{\text{xGlu}(\text{Asp/OAA})} = 0$$

$$d[\text{Glu}_{\text{Glu}}]/dt = V_{\text{cyc}(\text{Glu/Gln})} + V_{\text{xGlu}(\text{KG/Glu})} - (V_{\text{cyc}(\text{Glu/Gln})} + V_{\text{xGlu}(\text{Glu/KG})}) = 0$$

$$d[\text{KG}_{\text{Glu}}]/dt = V_{\text{xGlu}(\text{Glu/KG})} + V_{\text{dil}(\text{Glu})} + V_{\text{pdh}(\text{Glu})} - (V_{\text{xGlu}(\text{KG/Glu})} + V_{\text{TCA}(\text{Glu})}) = 0$$

$$d[\text{OAA}_{\text{Glu}}]/dt = V_{\text{xGlu}(\text{Asp/OAA})} + V_{\text{TCA}(\text{Glu})} - (V_{\text{xGlu}(\text{OAA/Asp})} + V_{\text{TCA}(\text{Glu})}) = 0$$

### Isotope balance equations

$$d[\text{Glc}_{\text{brain},16}^*]/dt = V_{\text{max}_{\text{in}}} \text{Glc}_{\text{blood},16}/(\text{Km}_{\text{in}} + \text{Glc}_{\text{blood}}) - V_{\text{max}_{\text{out}}} \text{Glc}_{\text{brain},16}/(\text{Km}_{\text{out}} + \text{Glc}_{\text{brain}}) - \text{CMR}_{\text{glc}} (\text{Glc}_{\text{brain},16}/\text{Glc}_{\text{brain}})$$

$$d[\text{L}_3^*]/dt = \text{CMR}_{\text{glc}} (\text{Glc}_{\text{brain},16}/\text{Glc}_{\text{brain}}) + V_{\text{dilLac}(\text{influx})} (0) - (V_{\text{PC}} + V_{\text{dilLac}(\text{efflux})} + V_{\text{pdh}(a)} + V_{\text{pdh}(\text{Gaba})} + V_{\text{pdh}(\text{Glu})}) (\text{L}_3/\text{L})$$

$$d[\text{Asp}_{\text{a}2}^*]/dt = V_{\text{xa}(\text{OAA/Asp})} (\text{OAA}_{\text{a}2}^*/\text{OAA}_a) - V_{\text{xa}(\text{Asp/OAA})} (\text{Asp}_{\text{a}2}^*/\text{Asp}_a)$$

$$d[\text{Asp}_{\text{a}3}^*]/dt = V_{\text{xa}(\text{OAA/Asp})} (\text{OAA}_{\text{a}3}^*/\text{OAA}_a) - V_{\text{xa}(\text{Asp/OAA})} (\text{Asp}_{\text{a}3}^*/\text{Asp}_a)$$

$$d[\text{Glu}_{\text{a}3}^*]/dt = V_{\text{xa}(\text{KG/Glu})} (\text{KG}_{\text{a}3}^*/\text{KG}_a) + V_{\text{cyc}(\text{Glu/Gln})} (\text{Glu}_{\text{Glu}3}^*/\text{Glu}_{\text{Glu}}) + V_{\text{cyc}(\text{Gaba/Gln})} (\text{KG}_{\text{a}3}^*/\text{KG}_a) - (V_{\text{Gln}} + V_{\text{xa}(\text{Glu/KG})}) (\text{Glu}_{\text{a}3}^*/\text{Glu}_a)$$

$$d[\text{Glu}_{\text{a}4}^*]/dt = V_{\text{cyc}(\text{Glu/Gln})} (\text{Glu}_{\text{Glu}4}^*/\text{Glu}_{\text{Glu}}) + V_{\text{xa}(\text{KG/Glu})} (\text{KG}_{\text{a}4}^*/\text{KG}_a) + V_{\text{cyc}(\text{Gaba/Gln})} (\text{KG}_{\text{a}4}^*/\text{KG}_a) - (V_{\text{Gln}} + V_{\text{xa}(\text{Glu/KG})}) (\text{Glu}_{\text{a}4}^*/\text{Glu}_a)$$

$$d[\text{KG}_{\text{a}3}^*]/dt = V_{\text{xa}(\text{Glu/KG})} (\text{Glu}_{\text{a}3}^*/\text{Glu}_a) + V_{\text{TCA}(a)} (\text{OAA}_{\text{a}2}^*/\text{OAA}_a) - (V_{\text{TCA}(a)\text{Net}} + V_{\text{xa}(\text{KG/Glu})} + V_{\text{cyc}(\text{Gaba/Gln})}) (\text{KG}_{\text{a}3}^*/\text{KG}_a)$$

$$d[\text{KG}_{a4}^*]/dt = V_{\text{pdh}(a)} (L_3^* / L) + V_{\text{xa}(\text{Glu}/\text{KG})} (\text{Glu}_{a4}^* / \text{Glu}_a) + V_{\text{dil}(a)} (0) - (V_{\text{TCA}(a)\text{Net}} + V_{\text{xa}(\text{KG}/\text{Glu})} + V_{\text{cyc}(\text{Gaba}/\text{Gln})}) (\text{KG}_{a4}^* / \text{KG}_a)$$

$$d[\text{OAA}_{a2}^*]/dt = 0.5 V_{\text{TCA}(a)\text{Net}} ((\text{KG}_{a4}^* / \text{KG}_a) + (\text{KG}_{a3}^* / \text{KG}_a)) + V_{\text{xa}(\text{Asp}/\text{OAA})} (\text{Asp}_{a2}^* / \text{Asp}_a) + 0.5 V_{\text{PC}} (L_3^* / L) + V_{\text{cyc}(\text{Gaba}/\text{Gln})} (\text{GABA}_{\text{Gaba}2} / \text{GABA}_{\text{Gaba}}) - (V_{\text{xa}(\text{OAA}/\text{Asp})} + V_{\text{TCA}(a)}) (\text{OAA}_{a2}^* / \text{OAA}_a)$$

$$d[\text{OAA}_{a3}^*]/dt = V_{\text{cyc}(\text{Gaba}/\text{Gln})} (\text{GABA}_{\text{Gaba}3}^* / \text{GABA}_{\text{Gaba}}) + V_{\text{xa}(\text{Asp}/\text{OAA})} (\text{Asp}_{a3}^* / \text{Asp}_a) + 0.5 V_{\text{PC}} (L_3^* / L) + 0.5 V_{\text{TCA}(a)\text{Net}} ((\text{KG}_{a4}^* / \text{KG}_a) + (\text{KG}_{a3}^* / \text{KG}_a)) - (V_{\text{xa}(\text{OAA}/\text{Asp})} + V_{\text{TCA}(a)}) (\text{OAA}_{a3}^* / \text{OAA}_a)$$

$$d[\text{Gln}_3^*]/dt = V_{\text{Gln}} (\text{Glu}_{a3}^* / \text{Glu}_a) + V_{\text{dilGln}} (0) - (V_{\text{Gln}(\text{efflux})} + V_{\text{cyc}(\text{Glu}/\text{Gln})} + V_{\text{cyc}(\text{Gaba}/\text{Gln})}) (\text{Gln}_3^* / \text{Gln})$$

$$d[\text{Gln}_4^*]/dt = V_{\text{Gln}} (\text{Glu}_{a4}^* / \text{Glu}_a) + V_{\text{dilGln}} (0) - (V_{\text{Gln}(\text{efflux})} + V_{\text{cyc}(\text{Glu}/\text{Gln})} + V_{\text{cyc}(\text{Gaba}/\text{Gln})}) (\text{Gln}_4^* / \text{Gln})$$

$$d[\text{Asp}_{\text{Gaba}2}^*]/dt = V_{\text{xGaba}(\text{OAA}/\text{Asp})} (\text{OAA}_{\text{Gaba}2}^* / \text{OAA}_{\text{Gaba}}) - V_{\text{xGaba}(\text{Asp}/\text{OAA})} (\text{Asp}_{\text{Gaba}2}^* / \text{Asp}_{\text{Gaba}})$$

$$d[\text{Asp}_{\text{Gaba}3}^*]/dt = V_{\text{xGaba}(\text{OAA}/\text{Asp})} (\text{OAA}_{\text{Gaba}3}^* / \text{OAA}_{\text{Gaba}}) - V_{\text{xGaba}(\text{Asp}/\text{OAA})} (\text{Asp}_{\text{Gaba}3}^* / \text{Asp}_{\text{Gaba}})$$

$$d[\text{GABA}_{\text{Gaba}2}^*]/dt = V_{\text{GAD}} (\text{Glu}_{\text{Gaba}4}^* / \text{Glu}_{\text{Gaba}}) - (V_{\text{shunt}} + V_{\text{cyc}(\text{Gaba}/\text{Gln})}) (\text{GABA}_{\text{Gaba}2}^* / \text{GABA}_{\text{Gaba}})$$

$$d[\text{GABA}_{\text{Gaba}3}^*]/dt = V_{\text{GAD}} (\text{Glu}_{\text{Gaba}3}^* / \text{Glu}_{\text{Gaba}}) - (V_{\text{shunt}} + V_{\text{cyc}(\text{Gaba}/\text{Gln})}) (\text{GABA}_{\text{Gaba}3}^* / \text{GABA}_{\text{Gaba}})$$

$$d[\text{Glu}_{\text{Gaba}3}^*]/dt = V_{\text{cyc}(\text{Gln}/\text{Gaba})} (\text{Gln}_3^* / \text{Gln}) + V_{\text{xGaba}(\text{KG}/\text{Glu})} (\text{KG}_{\text{Gaba}3}^* / \text{KG}_{\text{Gaba}}) - (V_{\text{GAD}} + V_{\text{xGaba}(\text{Glu}/\text{KG})}) (\text{Glu}_{\text{Gaba}3}^* / \text{Glu}_{\text{Gaba}})$$

$$d[\text{Glu}_{\text{Gaba}4}^*]/dt = V_{\text{cyc}(\text{Gln}/\text{Gaba})} (\text{Gln}_4^* / \text{Gln}) + V_{\text{xGaba}(\text{KG}/\text{Glu})} (\text{KG}_{\text{Gaba}4}^* / \text{KG}_{\text{Gaba}}) - (V_{\text{GAD}} + V_{\text{xGaba}(\text{Glu}/\text{KG})}) (\text{Glu}_{\text{Gaba}4}^* / \text{Glu}_{\text{Gaba}})$$

$$d[\text{KG}_{\text{Gaba}3}^*]/dt = V_{\text{xGaba}(\text{Glu}/\text{KG})} (\text{Glu}_{\text{Gaba}3}^* / \text{Glu}_{\text{Gaba}}) + V_{\text{TCA}(\text{Gaba})} (\text{OAA}_{\text{Gaba}3}^* / \text{OAA}_{\text{Gaba}}) - (V_{\text{TCA}(\text{Gaba})\text{Net}} + V_{\text{xGaba}(\text{KG}/\text{Glu})}) (\text{KG}_{\text{Gaba}3}^* / \text{KG}_{\text{Gaba}})$$

$$d[\text{KG}_{\text{Gaba}4}^*]/dt = V_{\text{pdh}(\text{Gaba})} (L_3^* / L) + V_{\text{xGaba}(\text{Glu}/\text{KG})} (\text{Glu}_{\text{Gaba}4}^* / \text{Glu}_{\text{Gaba}}) + V_{\text{dil}(\text{Gaba})} (0) - (V_{\text{TCA}(\text{Gaba})\text{Net}} + V_{\text{xGaba}(\text{KG}/\text{Glu})}) (\text{KG}_{\text{Gaba}4}^* / \text{KG}_{\text{Gaba}})$$

$$d[\text{OAA}_{\text{Gaba}2}^*]/dt = 0.5 V_{\text{TCA}(\text{Gaba})\text{Net}} ((\text{KG}_{\text{Gaba}3}^* / \text{KG}_{\text{Gaba}}) + (\text{KG}_{\text{Gaba}4}^* / \text{KG}_{\text{Gaba}})) + 0.5 V_{\text{shunt}} ((\text{GABA}_{\text{Gaba}2} / \text{GABA}_{\text{Gaba}}) + (\text{GABA}_{\text{Gaba}3}^* / \text{GABA}_{\text{Gaba}})) + V_{\text{xGaba}(\text{Asp}/\text{OAA})} (\text{Asp}_{\text{Gaba}2}^* / \text{Asp}_{\text{Gaba}}) - (V_{\text{TCA}(\text{Gaba})} + V_{\text{xGaba}(\text{OAA}/\text{Asp})}) (\text{OAA}_{\text{Gaba}2}^* / \text{OAA}_{\text{Gaba}})$$

$$d[\text{OAA}_{\text{Gaba}3}^*]/dt = 0.5 V_{\text{TCA}(\text{Gaba})\text{Net}} ((\text{KG}_{\text{Gaba}4}^* / \text{KG}_{\text{Gaba}}) + (\text{KG}_{\text{Gaba}3}^* / \text{KG}_{\text{Gaba}})) + 0.5 V_{\text{shunt}} ((\text{GABA}_{\text{Gaba}2} / \text{GABA}_{\text{Gaba}}) + (\text{GABA}_{\text{Gaba}3} / \text{GABA}_{\text{Gaba}})) + V_{\text{xGaba}(\text{Asp}/\text{OAA})} (\text{Asp}_{\text{Gaba}3}^* / \text{Asp}_{\text{Gaba}}) - (V_{\text{TCA}(\text{Gaba})} + V_{\text{xGaba}(\text{OAA}/\text{Asp})}) (\text{OAA}_{\text{Gaba}3}^* / \text{OAA}_{\text{Gaba}})$$

$$d[\text{Asp}_{\text{Glu}2}^*]/dt = V_{\text{xGlu}(\text{OAA}/\text{Asp})} (\text{OAA}_{\text{Glu}2}^* / \text{OAA}_{\text{Glu}}) - V_{\text{xGlu}(\text{Asp}/\text{OAA})} (\text{Asp}_{\text{Glu}2}^* / \text{Asp}_{\text{Glu}})$$

$$d[\text{Asp}_{\text{Glu3}}^*]/dt = V_{\text{xGlu(OAA/Asp)}} (\text{OAA}_{\text{Glu3}}^* / \text{OAA}_{\text{Glu}}) - V_{\text{xGlu(Asp/OAA)}} (\text{Asp}_{\text{Glu3}}^* / \text{Asp}_{\text{Glu}})$$

$$d[\text{Glu}_{\text{Glu3}}^*]/dt = V_{\text{cyc(Gln/Glu)}} (\text{Gln}_3^* / \text{Gln}) + V_{\text{xGlu(KG/Glu)}} (\text{KG}_{\text{Glu3}}^* / \text{KG}_{\text{Glu}}) - (V_{\text{cyc(Glu/Gln)}} + V_{\text{xGlu(Glu/KG)}}) (\text{Glu}_{\text{Glu3}}^* / \text{Glu}_{\text{Glu}})$$

$$d[\text{Glu}_{\text{Glu4}}^*]/dt = V_{\text{cyc(Gln/Glu)}} (\text{Gln}_4^* / \text{Gln}) + V_{\text{xGlu(KG/Glu)}} (\text{KG}_{\text{Glu4}}^* / \text{KG}_{\text{Glu}}) - (V_{\text{cyc(Glu/Gln)}} + V_{\text{xGlu(Glu/KG)}}) (\text{Glu}_{\text{Glu4}}^* / \text{Glu}_{\text{Glu}})$$

$$d[\text{KG}_{\text{Glu3}}^*]/dt = V_{\text{xGlu(Glu/KG)}} (\text{Glu}_{\text{Glu3}}^* / \text{Glu}_{\text{Glu}}) + V_{\text{TCA(Glu)}} (\text{OAA}_{\text{Glu2}}^* / \text{OAA}_{\text{Glu}}) - (V_{\text{xGlu(KG/Glu)}} + V_{\text{TCA(Glu)}}) (\text{KG}_{\text{Glu3}}^* / \text{KG}_{\text{Glu}})$$

$$d[\text{KG}_{\text{Glu4}}^*]/dt = V_{\text{xGlu(Glu/KG)}} (\text{Glu}_{\text{Glu4}}^* / \text{Glu}_{\text{Glu}}) + V_{\text{dil(Glu)}} (0) + V_{\text{pdh(Glu)}} (L_3^* / L) - (V_{\text{xGlu(KG/Glu)}} + V_{\text{TCA(Glu)}}) (\text{KG}_{\text{Glu4}}^* / \text{KG}_{\text{Glu}})$$

$$d[\text{OAA}_{\text{Glu2}}^*]/dt = V_{\text{xGlu(Asp/OAA)}} (\text{Asp}_{\text{Glu2}}^* / \text{Asp}_{\text{Glu}}) + 0.5 V_{\text{TCA(Glu)}} ((\text{KG}_{\text{Glu4}}^* / \text{KG}_{\text{Glu}}) + (\text{KG}_{\text{Glu3}}^* / \text{KG}_{\text{Glu}})) - (V_{\text{xGlu(Asp/OAA)}} + V_{\text{TCA(Glu)}}) (\text{OAA}_{\text{Glu2}}^* / \text{OAA}_{\text{Glu}})$$

$$d[\text{OAA}_{\text{Glu3}}^*]/dt = V_{\text{xGlu(Asp/OAA)}} (\text{Asp}_{\text{Glu3}}^* / \text{Asp}_{\text{Glu}}) + 0.5 V_{\text{TCA(Glu)}} ((\text{KG}_{\text{Glu3}}^* / \text{KG}_{\text{Glu}}) + (\text{KG}_{\text{Glu4}}^* / \text{KG}_{\text{Glu}})) - (V_{\text{xGlu(OAA/Asp)}} + V_{\text{TCA(Glu)}}) (\text{OAA}_{\text{Glu3}}^* / \text{OAA}_{\text{Glu}})$$

### Values of parameters

$$\text{CMR}_{\text{glc}} = (V_{\text{pdh(a)}} + V_{\text{pdh(Glu)}} + V_{\text{pdh(Gaba)}} + V_{\text{PC}})/2$$

$\text{Km}_{\text{in}} = 13.9 \text{ mM}$ ; Michaelis–Menten half-saturation constant for blood-to-brain glucose transport (1).

$\text{Km}_{\text{out}} = \text{Km}_{\text{in}} \times V_{\text{d}} = 10.7 \text{ } \mu\text{mol/g}$ ; Michaelis–Menten half-saturation constant for brain-to-blood glucose transport

$V_{\text{max}_{\text{in}}} = 5.8 \times \text{CMR}_{\text{glc}}$ , Michaelis–Menten maximum uptake rate for blood-to-brain glucose transport (1).

$V_{\text{max}_{\text{out}}} = V_{\text{max}_{\text{in}}}$ , Michaelis–Menten maximum uptake rate for brain-to-blood glucose transport.

$V_{\text{d}} = 0.77 \text{ ml/g}$ ; brain water space (2)

$V_{\text{Gln}} = V_{\text{cyc(Gln/Glu)}} + V_{\text{cyc(Gln/Gaba)}} + V_{\text{PC}}$ , glutamine synthesis flux.

$V_{\text{PC}} = 0.2 \times V_{\text{Gln}}$ , anaplerotic flux (3).

$V_{TCA(Glu)}$ , flux through glutamatergic TCA cycle (iterated).

$V_{cyc(Glu/Gln)} = V_{cyc(Gln/Glu)} = 0.45 \times V_{TCA(Glu)}$ , glutamate/glutamine cycle flux, estimated using Eq. 5.

$V_{TCA(Gaba)Net}$ , the net flux through the GABAergic TCA cycle (iterated).

$V_{shunt}$ , flux through the GABA shunt (iterated).

$V_{TCA(Gaba)} = V_{TCA(Gaba)Net} + V_{shunt}$ .

$V_{cyc(Gaba/Gln)} = V_{cyc(Gln/Gaba)} = 0.63 \times V_{TCA(Gaba)}$ , GABA/glutamine cycle flux, estimated using Eq. 11.

$V_{dil(a)}$ , diluting inflow of astroglial lactate from blood (iterated).

$V_{dil(Gaba)}$ , diluting inflow flux of GABA lactate from blood (iterated).

$V_{dilGln}$ , diluting inflow flux of brain glutamine from blood glutamine (iterated).

$V_{dilGlu}$ , diluting inflow flux of brain glutamate from blood lactate (iterated).

$V_{Gln(efflux)} = V_{PC} + V_{dilGln}$ , glutamine efflux from brain.

$V_{GAD} = V_{shunt} + V_{cyc(Gaba/Gln)}$ , GABA synthesis rate.

$V_{pdh(a)} = 0.176 \times V_{TCA(Glu)}$ , astroglial pyruvate dehydrogenase flux (4)

$V_{TCA(a)Net} = V_{pdh(a)} + V_{dil(a)} - V_{PC} - V_{cyc(Gaba/Gln)}$ , net flux through the astroglial TCA cycle.

$V_{pdh(Gaba)} = V_{TCA(Gaba)} - V_{dil(Gaba)}$ , GABAergic pyruvate dehydrogenase flux.

$V_{pdh(Glu)} = V_{TCA(Glu)} - V_{dil(Glu)}$ , glutamatergic pyruvate dehydrogenase flux.

$V_{TCA(a)} = V_{TCA(a)Net} + V_{PC} + V_{cyc(Gaba/Gln)}$ , astroglial TCA cycle flux.

$V_{xa(OAA/Asp)} = V_{xa(Glu/KG)}$ , mitochondrial/cytosolic OAA-to-Asp exchange rate in astroglia.

$V_{xa(Asp/OAA)} = V_{xa(Glu/KG)}$ , cytosolic/mitochondrial Asp-to-OAA exchange rate in astroglia.

$V_{xa(KG/Glu)} = V_{xa(Glu/KG)} + V_{PC}$ , mitochondrial/cytosolic KG-to-Glu exchange rate in astroglia.

$V_{xa(Glu/KG)}$ , cytosolic/mitochondrial Glu-to-KG exchange rate in astroglia.

$V_{xGaba(KG/Glu)}$ , mitochondrial/cytosolic KG-to-Glu exchange rate in GABAergic neurons.

$V_{xGaba(Glu/KG)} = V_{xGaba(KG/Glu)} + V_{GAD} - V_{cyc(Gaba/Gln)}$ , mitochondrial/cytosolic Glu-to-KG exchange rate in GABAergic neurons.

$V_{xGaba(OAA/Asp)} = V_{xGaba(KG/Glu)}$ , mitochondrial/cytosolic OAA-to-Asp exchange rate in GABAergic neurons.

$V_{xGaba(Asp/OAA)} = V_{xGaba(OAA/Asp)}$ , cytosolic/mitochondrial Asp-to-OAA exchange rate in GABAergic neurons.

$V_{xGlu(Asp/OAA)} = V_{xGlu(KG/Glu)}$ , mitochondrial/cytosolic Asp-to-OAA exchange rate in glutamatergic neurons.

$V_{xGlu(OAA/Asp)} = V_{xGlu(KG/Glu)}$ , mitochondrial/cytosolic OAA-to-Asp exchange rate in glutamatergic neurons.

$V_{xGlu(KG/Glu)}$ , mitochondrial/cytosolic KG-to-Glu exchange rate in glutamatergic neurons.

$V_{xGlu(Glu/KG)} = V_{xGlu(KG/Glu)}$ , cytosolic/mitochondrial Glu-to-KG exchange rate in glutamatergic neurons.

$X_1 = V_{max_{in}} \times Glc_{blood} / (K_{m_{in}} + Glc_{blood})$ , value used to calculate the concentration of brain glucose.

$X_2 = X_1 - CMR_{glc}$ , value used to calculate the concentration of brain glucose.

### **Concentrations of Metabolite Pools**

$[Asp_T] = 4.2 \mu\text{mol/g}$ , concentration of brain aspartate (measured).

$*[Asp_a] = 0.10 \times Asp_T = 0.42 \mu\text{mol/g}$ , concentration of astroglial aspartate.

$*[Asp_{Glu}] = 0.45 \times Asp_T = 1.92 \mu\text{mol/g}$ , concentration of aspartate in glutamatergic neurons.

$*[Asp_{Gaba}] = 0.45 \times Asp_T = 1.92 \mu\text{mol/g}$ , concentration of aspartate in GABAergic neurons.

$[GABA_{Gaba}] = [GABA_T] = 1.75 \mu\text{mol/g}$ , concentration of brain GABA (measured).

$[Glc_{brain}]$ , concentration of brain glucose (calculated based on ref. 1).

$[Gln] = 6.83 \mu\text{mol/g}$ , concentration of brain glutamine (measured).

$[Glu_a] = 0.10 \times Glu_T = 1.44 \mu\text{mol/g}$ , concentration of glutamate in astroglia, 10% of total (5).

$[Glu_{Glu}] = 0.88 \times Glu_T = 12.65 \mu\text{mol/g}$ , concentration of glutamate in glutamatergic neurons (5).

$[Glu_{Gaba}] = 0.02 \times Glu_T = 0.29 \mu\text{mol/g}$ , concentration of glutamate in GABAergic neurons, 2% of total (6, 7)

$\dagger[\text{KG}_a] = 0.020 \mu\text{mol/g}$ , concentration of  $\alpha$ -ketoglutarate in astroglia.

$\dagger[\text{KG}_{\text{Gaba}}] = 0.004 \mu\text{mol/g}$ , concentration of  $\alpha$ -ketoglutarate in GABAergic neurons.

$\dagger[\text{KG}_{\text{Glu}}] = 0.176 \mu\text{mol/g}$ , concentration of  $\alpha$ -ketoglutarate in glutamatergic neurons.

$[\text{L}] = 1.50 \mu\text{mol/g}$ , concentration of brain lactate (measured).

$\dagger[\text{OAA}_a] = 0.020 \mu\text{mol/g}$ , concentration of oxaloacetate in astroglia.

$\dagger[\text{OAA}_{\text{Gaba}}] = 0.004 \mu\text{mol/g}$ , concentration of oxaloacetate in GABAergic neurons.

$\dagger[\text{OAA}_{\text{Glu}}] = 0.176 \mu\text{mol/g}$ , concentration of oxaloacetate in glutamatergic neurons.

\*The distribution of tissue aspartate (Asp) among different cell types is unknown. In our analysis, the concentration ratio of astroglial-to-total aspartate was assumed to be the same as for glutamate, i.e.  $\text{Asp}_a$  is 10% of the total Asp pool. The remaining Asp (90%) was assumed to be equally distributed between glutamatergic (45%) and GABAergic neurons (45%).

$\dagger$ The cellular concentration distribution of  $\text{KG}_a:\text{KG}_{\text{Gaba}}:\text{KG}_{\text{Glu}}$  and  $\text{OAA}_a:\text{OAA}_{\text{Gaba}}:\text{OAA}_{\text{Glu}}$  was assumed to be the same as the cellular percentage distribution of glutamate, i.e. 10:2:88.

1. Mason, G. F., Behar, K. L., Rothman, D. L. & Shulman, R. G. (1992) *J. Cereb. Blood Flow Metab.* **12**, 448-455.
2. Lund-Andersen, H. (1979) *Physiol. Rev.* **59**, 305-352.
3. Sibson, N. R., Mason, G. F., Shen, J., Cline, G. W., Herskovits, A. Z., Wall, J. E., Behar, K. L., Rothman, D. L. & Shulman, R. G. (2001) *J. Neurochem.* **76**, 975-989.
4. Lebon, V., Petersen, K. F., Cline, G. W., Shen, J., Mason, G. F., Dufour, S., Behar, K. L., Shulman, G. I. & Rothman, D. L. (200) *J. Neurosci.* **22**, 1523-1531.
5. van den Berg, C. J. & Garfinkel, D. (1971) *Biochem. J.* **123**, 211-218.
6. Patel, A. J., Johnson, A. L. & Balazs, R. (1974) *J. Neurochem.* **23**, 1271-1279.
7. Storm-Mathisen, J., Leknes, A. K., Bore, A. T., Vaaland, J. L., Edminson, P., Haug, F. M. & Ottersen, O. P. (1983) *Nature* **301**, 517-520.
