# Supplementary material
Source: PubMed Central journal article supplement (PMC556230)

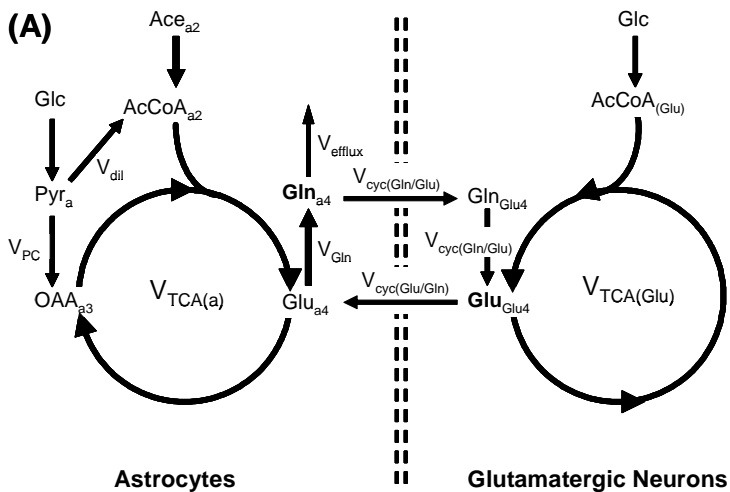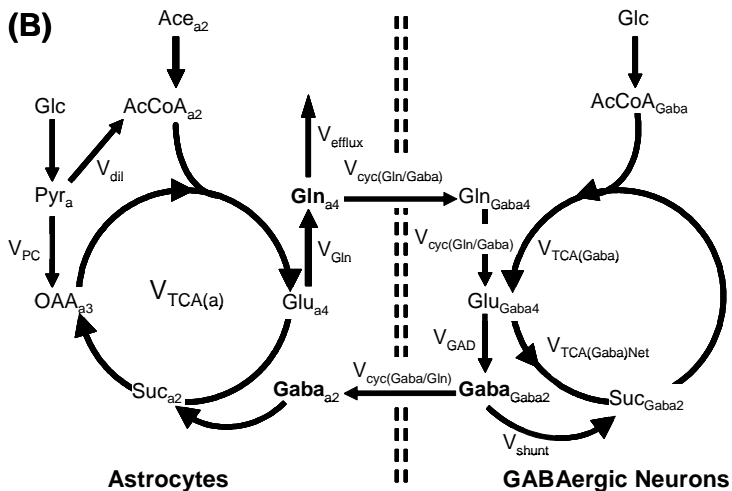

Supplement: pnas_102_15_5588__2.pdf [file pnas_102_15_5588__2.pdf]
